# Distinct Binding Mechanisms for Allosteric Sodium Ion In Cannabinoid Receptors

Soumajit Dutta,<sup>†</sup> Balaji Selvam,<sup>†</sup> and Diwakar Shukla<sup>\*,†,‡,¶,§,||</sup>

<sup>†</sup>*Department of Chemical and Biomolecular Engineering, University of Illinois at Urbana-Champaign, Urbana, IL, 61801*

<sup>‡</sup>*Center for Biophysics and Quantitative Biology, University of Illinois at Urbana-Champaign, Urbana, IL, 61801*

<sup>¶</sup>*National Center for Supercomputing Applications, University of Illinois, Urbana, IL, 61801*

<sup>§</sup>*Beckman Institute for Advanced Science and Technology, University of Illinois at Urbana-Champaign, Urbana, IL, 61801*

<sup>||</sup>*NIH Center for Macromolecular Modeling and Bioinformatics, University of Illinois at Urbana-Champaign, Urbana, IL, 61801*

E-mail: diwakar@illinois.edu

## Abstract

The therapeutical potential of Cannabinoid receptors is not fully explored due to psychoactive side-effects and lack of selectivity associated with the orthosteric ligands. Allosteric modulators have the potential to become selective therapeutics for cannabinoid receptors. Biochemical experiments have shown the effects of the allosteric Na<sup>+</sup> binding on cannabinoid receptor activity. However, the Na<sup>+</sup> coordination site, and binding pathway are still unknown. Here, we perform molecular dynamic simulations to explore Na<sup>+</sup> binding in the cannabinoid receptors, CB<sub>1</sub> and CB<sub>2</sub>. Simulations reveal

that  $\text{Na}^+$  binds to the primary binding site from different extracellular sites for  $\text{CB}_1$  and  $\text{CB}_2$ . A distinct secondary  $\text{Na}^+$  coordinate site is identified that is not present in  $\text{CB}_2$ . Furthermore, simulations also show that intracellular  $\text{Na}^+$  could bind to the  $\text{Na}^+$  binding site in  $\text{CB}_1$ . Constructed Markov state models show that the standard free energy of  $\text{Na}^+$  binding is similar to the previously calculated free energy for other class A GPCRs.

## Introduction

Cannabinoid receptors are part of the endocannabinoid system, which control cellular homeostasis by intracellular signal transduction (1). In the last decade of the twentieth century, cannabinoid receptor 1 ( $\text{CB}_1$ ) and 2 ( $\text{CB}_2$ ) were discovered as a target of cannabinoid compounds, the major constituents of marijuana (2, 3).  $\text{CB}_1$  and  $\text{CB}_2$  belong to the class A GPCRs (4), the largest subfamily of GPCR proteins.  $\text{CB}_1$  receptor, which is majorly expressed in the central and peripheral nervous system, has therapeutic potential for pain, obesity, and addiction (1, 5–9). On the other hand,  $\text{CB}_2$  receptors are expressed in human immune cells and peripheral tissues, and can be targeted for inflammatory, fibrotic diseases (10, 11). However, orthosteric ligands of these receptors are not available on the market as therapeutics due to lack of selectivity and over-stimulation effects. The lack of selectivity can be explained by the similarity of structure and sequence between the two cannabinoid receptors (12, 13). Furthermore, orthosteric agonists (e.g., fubinaca) and antagonists (e.g., rimonabant) of  $\text{CB}_1$  lead to overstimulated response (9, 14) and harmful side-effects like anxiety, depression (15). Therefore, to develop a therapeutic drug, an allosteric modulator can be a potential option due to two key reasons (16, 17). First, an allosteric site of a receptor is generally less conserved as compared to the orthosteric binding site. Hence, allosteric ligands can be more selective than orthosteric ligands (16). For instance, the allosteric ligand ORG27569 regulates the binding affinity of an orthosteric agonist CP55940 for  $\text{CB}_1$ , but not for  $\text{CB}_2$  (18). Second, allosteric ligands can only regulate receptor function in the presence of

orthosteric ligands and have ceiling efficacy controlling orthosteric ligand function (16, 17). Therefore, allosteric ligands could avoid over-stimulation effects. One such allosteric site for CB<sub>1</sub> and CB<sub>2</sub> is the Na<sup>+</sup> ion binding site coordinated by conserved D<sup>2.50</sup> and surrounding hydrophilic and hydrophobic residues (19–21). Na<sup>+</sup> acts as a conserved negative allosteric modulator (NAM) for class A GPCRs. This Na<sup>+</sup> binding site has been targeted for potential NAM drug design, which can mimic the effect of Na<sup>+</sup>. For instance, amiloride and its derivative have been shown to compete with Na<sup>+</sup> for binding in the allosteric site for different class A GPCRs (22, 23). Therefore, elucidation of Na<sup>+</sup> binding site and binding pathways for CB<sub>1</sub> and CB<sub>2</sub> are essential for designing a therapeutically selective allosteric modulator drug which can target this site.

Although biochemical experimental evidence showed that Na<sup>+</sup> acts as a NAM for CB<sub>1</sub> and CB<sub>2</sub>, none of the x-ray crystal or cryo-EM structures captured Na<sup>+</sup> in its putative binding site (5–9, 11, 24, 25). Therefore, the Na<sup>+</sup> co-ordination site is unknown for both these receptors. Previous structural studies have also shown that Na<sup>+</sup> co-ordination site shifts towards the intracellular site by one helical turn due to mutation of conserved N<sup>7.49</sup> to D<sup>7.49</sup> (23, 26). Superposition of the inactive structure of CB<sub>1</sub> (PDB ID: 5TGZ (5)) and CB<sub>2</sub> (PDB ID: 5ZTY (11)) reveals two key structural and sequence changes (Figure S1). First, The conserved S<sup>3.35</sup> residue in CB<sub>1</sub> is mutated into T<sup>3.35</sup> in CB<sub>2</sub>. Due to this mutation, T<sup>3.35</sup> moves away from conserved the D<sup>2.50</sup> in CB<sub>2</sub>. Second, Y<sup>3.35</sup> sidechain in the NPxxY motif in CB<sub>1</sub> points upward towards to Na<sup>+</sup> binding site while in CB<sub>2</sub> it points away from the Na<sup>+</sup> binding site towards TM5 (Figure S1). Therefore, we hypothesize that these changes in sequence and structure between receptor's allosteric Na<sup>+</sup> binding site lead to distinct Na<sup>+</sup> coordination sites which can significantly affect their drug pharmacophore preferences.

It is hard to determine the Na<sup>+</sup> binding pathway experimentally because the other transporters and Na<sup>+</sup> channels present in the cell can also affect the measurement of Na<sup>+</sup> flux or voltage difference between the two sides of the membrane. Hence, computational studies using molecular dynamics (MD) has been crucial to discover binding pathways for Na<sup>+</sup> (27–

33) and understand conformational equilibrium of GPCRs (34, 35). In particular, Selvam et al. has simulated the Na<sup>+</sup> binding pathways for 24 families of GPCRs to conclude that class A GPCRs follow a universal ion-binding mechanism (33). This study also showed that Na<sup>+</sup> could enter the binding site from both extracellular and intracellular region for different GPCRs. Comparative study on Na<sup>+</sup> binding for different opioid receptors has shown that Na<sup>+</sup> enters from different extracellular regions for  $\mu$ ,  $\kappa$ ,  $\delta$ -OR due to variation of the negatively charged residues in the loop regions of the receptors (27). Structural comparison of both cannabinoid receptors shows that the N-loop moves towards the orthosteric binding pocket and has acidic residues for CB<sub>1</sub> while for CB<sub>2</sub> it floats outside the orthosteric pocket (Figures 1A and 1B). N-loop positioning can significantly affect the Na<sup>+</sup> binding pathways for the receptors. Therefore, the Na<sup>+</sup> binding pathway for CB<sub>1</sub> and CB<sub>2</sub> may also be different.

To resolve Na<sup>+</sup> binding for cannabinoid receptors, we run atomic scale extensive molecular dynamics simulations to predict and compare the Na<sup>+</sup> binding site and pathway for each receptor. To determine the thermodynamics and kinetics of the binding process, Markov state models (MSM) are built using simulation data. Our results show that Na<sup>+</sup> binds via a distinct pathway from extracellular site to each of the receptors. For CB<sub>1</sub>, Na<sup>+</sup> binds with the help of negatively charged residues of downward N-loop inside orthosteric binding pocket; alternatively, Na<sup>+</sup> binds for CB<sub>2</sub> from the gap formed between TM1, TM2 and ECL1. Furthermore, we find an additional secondary binding site for Na<sup>+</sup> between TM1, TM2, and TM7 for CB<sub>1</sub>. This site does not exist in CB<sub>2</sub>. Our results also reveal that Na<sup>+</sup> can bind to the secondary binding site from the intracellular region. By determining new Na<sup>+</sup> binding site and identifying differences in the binding pathway between CB<sub>1</sub> and CB<sub>2</sub>, this study will aid in design of new allosteric drugs for cannabinoid receptors.

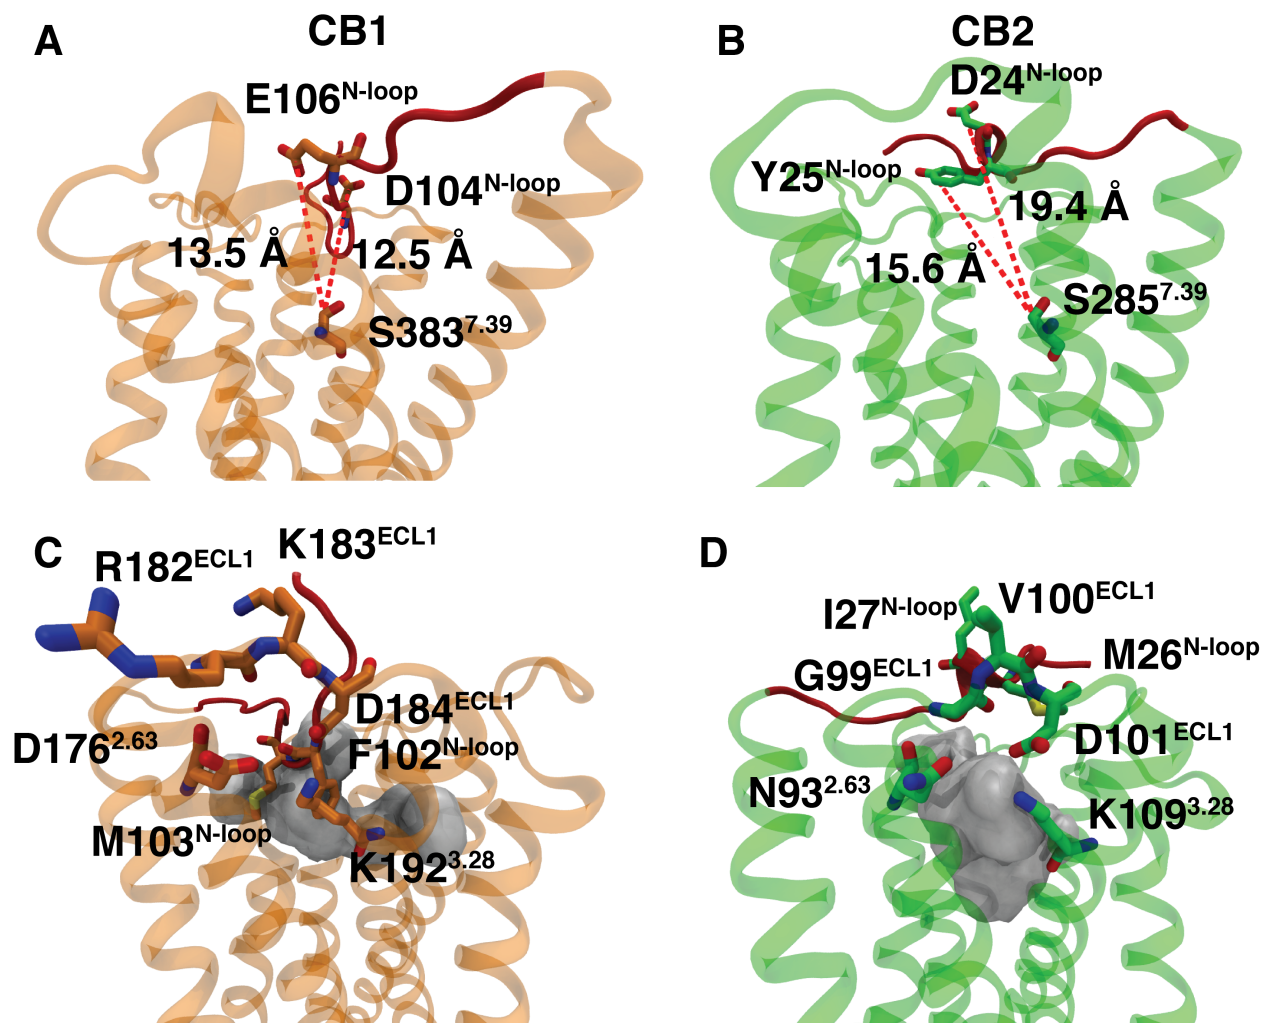

Figure 1: Extracellular Na<sup>+</sup> binding site comparison. The distances between polar residue in orthosteric binding pocket and polar residues in N-loop for inactive CB<sub>1</sub> (PDB ID: 5TGZ (5)) (A) and CB<sub>2</sub> (PDB ID: 5ZTY (11)) (B). The accessibility of orthosteric binding pocket volume from ECL1 site for inactive CB<sub>1</sub> (PDB ID: 5TGZ (5)) (C) and CB<sub>2</sub> (PDB ID: 5ZTY (11)) (D). Proteins are shown with cartoon representation (CB<sub>1</sub>: orange, CB<sub>2</sub>: green). N-loops are colored as red. Important residues are represented as sticks. Measured distances are shown as dotted line. Pocket volume was measured using Fpocket (36).

## Results

**Extracellular binding of Na<sup>+</sup> to cannabinoid receptors.** Comparing Na<sup>+</sup> binding simulation data of CB<sub>1</sub> and CB<sub>2</sub> reveals that Na<sup>+</sup> can bind to receptors from extracellular region, as shown in previous simulation studies for other GPCR proteins (27, 33). However, the exact extracellular Na<sup>+</sup> binding site varies for CB<sub>1</sub> and CB<sub>2</sub> due to the structural and

sequence variation between the receptors. For CB<sub>1</sub>, Na<sup>+</sup> binds with the assistance of negatively charged residues in N-loop (D104<sup>N-loop</sup>). In the inactive structure of CB<sub>1</sub>, the N-loop moves inside the orthosteric pocket which brings the D104<sup>N-loop</sup> adjacent to conserved polar residue S383<sup>7,39</sup> and backbone carbonyl group of A257<sup>7,36</sup> (Figure 1A). D104<sup>N-loop</sup> assists the movement of the Na<sup>+</sup> from the extracellular solvent layer to the orthosteric binding pocket (Figure S2A). During activation of CB<sub>1</sub>, this N-loop moves away from the pocket which may hinder the Na<sup>+</sup> binding from the extracellular side (6). Therefore, downward movement of N-loop may play a major role in stabilizing inactive states of CB<sub>1</sub> by aiding the binding of negative allosteric modulator Na<sup>+</sup>. Although, CB<sub>2</sub> also has negatively charged (D24<sup>N-loop</sup>) and polar residue (Y25<sup>N-loop</sup>) in the N-loop, major conformational change in the N-loop region is not observed between active and inactive structure of CB<sub>2</sub> as compared to CB<sub>1</sub>(24, 25). Therefore, D24<sup>N-loop</sup> and Y25<sup>N-loop</sup> remain outside the pocket and interact with Na<sup>+</sup> ion from extracellular region for  $14 \pm 0.2\%$  of the simulation time but cannot transfer the ion to the orthosteric pocket (Figures 1B and S3A).

We observe that the Na<sup>+</sup> binds from the gap between TM2, TM3, and ECL1 for CB<sub>2</sub>. For CB<sub>2</sub>, this region is connected to the orthosteric pocket as shown in Figure 1D. Negatively charged D101<sup>ECL1</sup>, polar N93<sup>2,63</sup> and backbone carbonyl group of G99<sup>ECL1</sup> helps Na<sup>+</sup> ion to bind and move to the orthosteric pocket of the CB<sub>2</sub> (Figure S2B). Previous studies have shown that D101<sup>ECL1</sup> residue is also important for binding of other ligands to CB<sub>2</sub> (37). CB<sub>1</sub> also have conserved D184<sup>ECL1</sup> residue in this position but the residue is surrounded by bulkier and positively charged R182<sup>ECL1</sup> and K183<sup>ECL1</sup> (Figure 1C). These positively charged residues block the access of D184<sup>ECL1</sup> to the extracellular Na<sup>+</sup>. In the simulated ensemble, only  $1.6 \pm 0.3\%$  MSM weighted frames of CB<sub>1</sub> have Na<sup>+</sup> bound to D184<sup>ECL1</sup>, whereas, in CB<sub>2</sub>,  $8.0 \pm 0.5\%$  frames have Na<sup>+</sup> bound to D101<sup>ECL1</sup> (Figure S3B). Furthermore, the path from the ECL1 to orthosteric pocket is hindered by downward hydrophobic N-loop residues for CB<sub>1</sub> as shown in figure (Figure 1C). Therefore, the structural and sequence variation in the N-loop and ECL1 site leads to different binding sites for Na<sup>+</sup> ion in the cannabinoid

receptors.

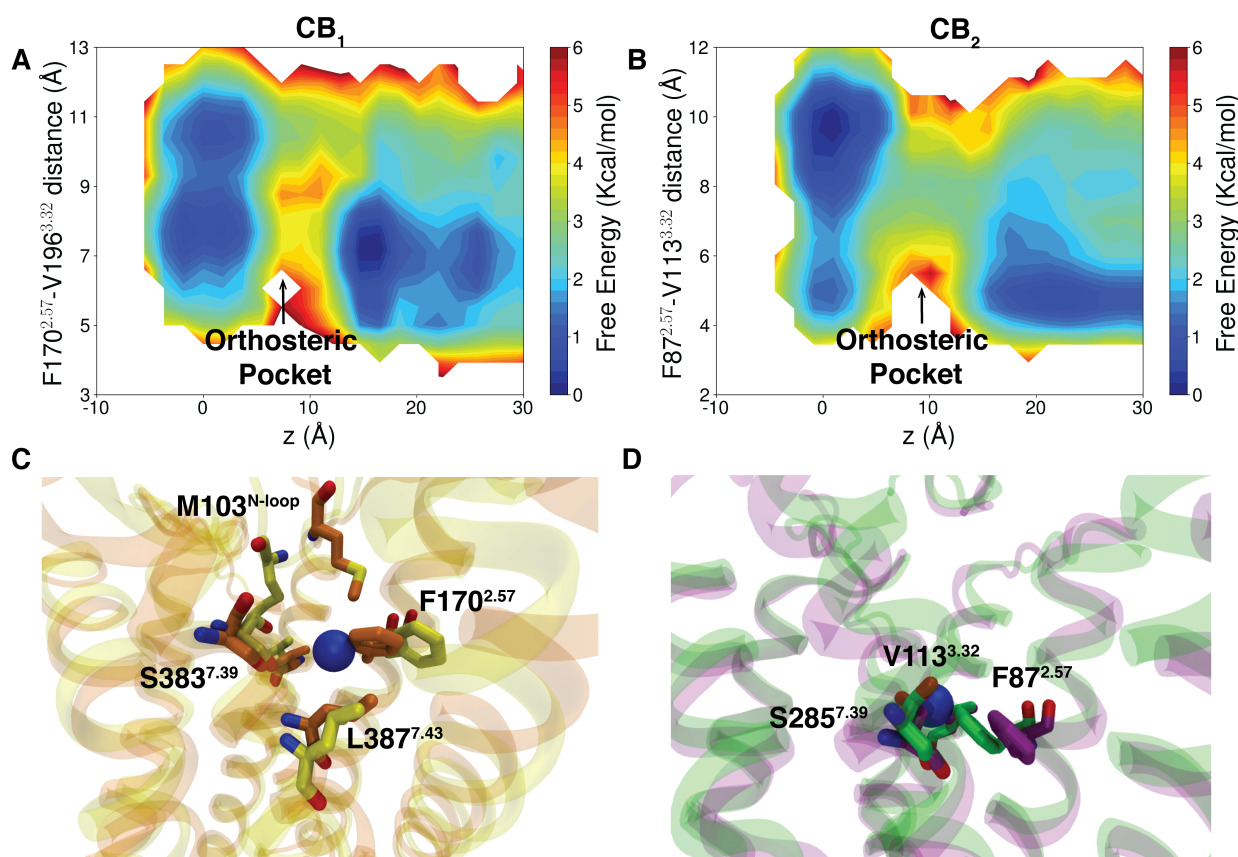

Figure 2: Important residue movement within the orthosteric binding site facilitating Na<sup>+</sup> binding. (A) shows MSM weighted free energy landscape projected along z component distance of Na<sup>+</sup> from D163<sup>2.50</sup> (O $\delta$ 1) and F170<sup>2.57</sup> (C $\gamma$ ) - V196<sup>3.32</sup> (C $\gamma$ ) distance for CB<sub>1</sub>. (B) shows MSM weighted free energy landscape projected along z component distance of Na<sup>+</sup> from D80<sup>2.50</sup> (O $\delta$ 1) and F87<sup>2.57</sup> (C $\gamma$ ) - V113<sup>3.32</sup> (C $\gamma$ ) distance for CB<sub>2</sub>. (C) and (D) represent superposition of inactive structure and MD snapshot where Na<sup>+</sup> bound in the orthosteric pocket for CB<sub>1</sub> and CB<sub>2</sub>. Proteins are represented as cartoon (Inactive CB<sub>1</sub>: orange, inactive CB<sub>2</sub>: green, CB<sub>1</sub> MD snapshot: yellow, CB<sub>2</sub> MD snapshot: violet). Important residues are represented as sticks. Na<sup>+</sup>s are represented as VDW representation (color: blue).

After recognition by the extracellular binding site, Na<sup>+</sup> moves to the orthosteric binding pocket for CB<sub>1</sub> and CB<sub>2</sub>. The orthosteric pocket of these receptors mostly consist of bulky hydrophobic residues except for S383<sup>7.39</sup> (CB<sub>1</sub>) or S285<sup>7.39</sup> (CB<sub>2</sub>). MSM-weighted free energy landscape projection of y and z coordinate of Na<sup>+</sup> with respect to D163<sup>2.50</sup> of CB<sub>1</sub> shows that the activation energy required to cross the free energy barrier is  $\sim 3 \pm 0.2$  kcal/mol (Figures S4A and S5A). Along the pathway, the Na<sup>+</sup> ion interacts with residues from trans-

membrane TM2, TM3, and TM7 (Figure S4C). To evaluate important residue movements inside the orthosteric pocket, we perform time independent component analysis (tiCA) on our simulation data. It reveals that the movement of F170<sup>2.57</sup> is crucial and it is one of the slowest process during the Na<sup>+</sup> binding (Figure S6C). MSM weighted free energy landscape shows that ensemble average distance between F170<sup>2.57</sup> (C $\gamma$ ) and V196<sup>3.32</sup> (C $\gamma$ ) is comparatively higher when Na<sup>+</sup> is in orthosteric binding pocket (9.5 Å) compared to when Na<sup>+</sup> is in bulk (7.1 Å) (Figures 2A, S7A and 2C). Due to this movement of conserved residues and the flexible N-loop, pore tunnel of radius  $2.1 \pm 0.1$  Å is created inside the binding pocket (Figure S8) for CB<sub>1</sub>. For CB<sub>2</sub>, similar interactions are observed in orthosteric binding pocket. The activation barrier to move the orthosteric pocket from ECL1 binding site is close to  $\sim 3.5 \pm 0.2$  kcal/mol (Figures S4B, and S5B). Conserved F87<sup>2.57</sup> residue in the similar position as CB<sub>1</sub> is also found to be crucial for Na<sup>+</sup> movement in CB<sub>2</sub> (Figures S6B). In this case, the average distance between F87<sup>2.57</sup> and V113<sup>3.32</sup> increases by 2.4 Å when Na<sup>+</sup> is bound inside the pocket (Figures 2B, S7B and 2D). The radius of the pore tunnel generated by this movement is 2.6 Å (Figure S8). Therefore, these residue movements facilitate the Na<sup>+</sup> to cross the hydrophobic barrier in the orthosteric pocket and bind to Na<sup>+</sup> binding pocket.

**Na<sup>+</sup> binding site for CB<sub>1</sub> and CB<sub>2</sub>.** From the orthosteric binding site, Na<sup>+</sup> moves to the primary Na<sup>+</sup> binding site. To calculate the timescale for the transition between orthosteric pocket and Na<sup>+</sup> binding site, we measure the mean free passage time using transition path theory (TPT). The timescale for transition is similar for both the receptor (Figures 3A, 3B, and S9). For CB<sub>1</sub>, this transition happens in  $3.0 \pm 1.6 \mu s$  whereas for CB<sub>2</sub> it takes  $0.5 \pm 0.4 \mu s$ . In the primary binding site, Na<sup>+</sup> is co-ordinated by D<sup>2.50</sup>, S<sup>3.39</sup>, and N<sup>7.45</sup>, which is similar to other class A GPCRs from the same branch ( $\alpha$  branch) (Figures S10A, S10B, S11A, and S11B). However, superimposing the MD snapshots of CB<sub>1</sub> and CB<sub>2</sub> with other branches of class A ( $\delta$  (PAR1) and  $\gamma(\delta - OR)$ ) shows that Na<sup>+</sup> coordination site differs slightly. For PAR1, Na<sup>+</sup> binds towards intracellular side as compared to CB<sub>1</sub> and CB<sub>2</sub> and interacts with D<sup>7.49</sup> instead on N<sup>7.45</sup> (Figures S10C and S11C). In case of  $\delta - OR$ ,



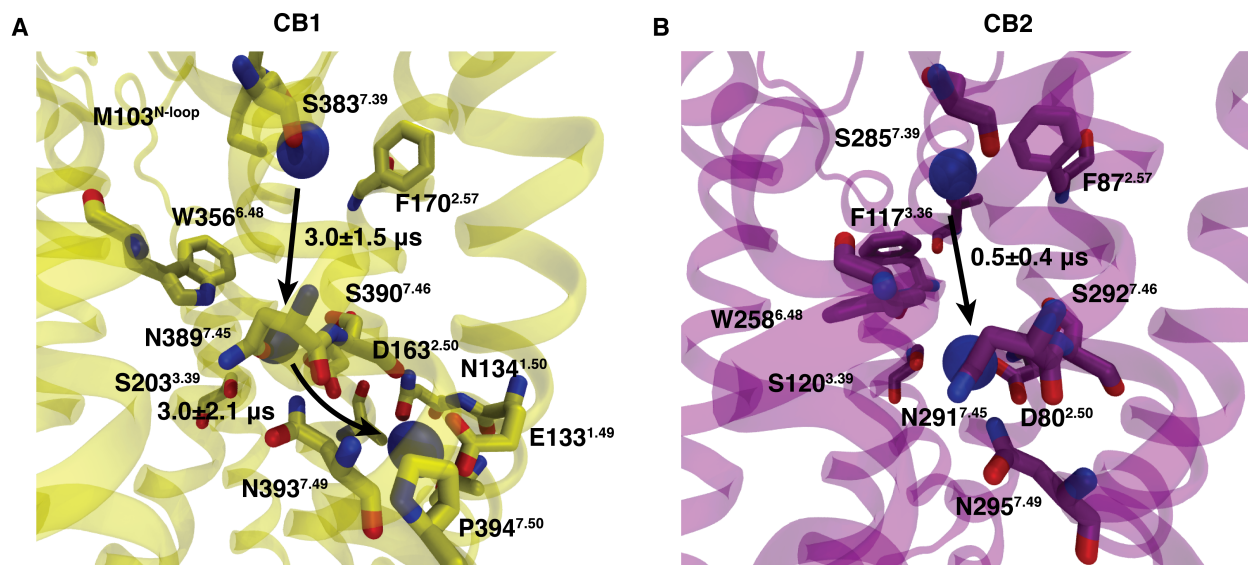

Figure 3: Binding of Na<sup>+</sup> from orthosteric binding site to the Na<sup>+</sup> binding pocket. (A) Representation of Na<sup>+</sup> in different positions in CB<sub>1</sub> (orthosteric binding site, primary Na<sup>+</sup> binding site, secondary Na<sup>+</sup> binding site). (B) Representation of Na<sup>+</sup> in different positions in CB<sub>2</sub> (orthosteric binding site, primary Na<sup>+</sup> binding site). Arrows represent the direction of Na<sup>+</sup> movement. Important residues are represented as sticks. Proteins are shown as Cartoon (CB<sub>1</sub>: yellow, CB<sub>2</sub>: magenta).

Na<sup>+</sup> binds closer to TM3 as compared to CB<sub>1</sub> and CB<sub>2</sub> (Figures S10D and S11D).

On top of the primary binding site, we discover a secondary binding site for CB<sub>1</sub> between TM1, TM2 and TM7 which does not exist for CB<sub>2</sub> (Figures 3A, S4A, and S4B). To characterize this newly found site, MSM weighted free energy landscape between Y153<sup>2.40</sup>-Y397<sup>7.53</sup> and D163<sup>2.50</sup>-N393<sup>7.49</sup> residue distance were estimated (Figure 4A). The two stable states could be seen in the landscape. In the state I, Y397<sup>7.53</sup> faces towards the binding site and N393<sup>7.49</sup> remains close to D163<sup>2.50</sup> (Figure 4C). In state II, Y397<sup>7.53</sup> moves away from the Na<sup>+</sup> binding pocket. Due to this movement, N393<sup>7.49</sup> moves away from D163<sup>2.50</sup>. This larger distance between TM2 and TM7 allows Na<sup>+</sup> to migrate to the secondary binding site. This binding site is surrounded by residues polar (N134<sup>1.50</sup>, N393<sup>7.49</sup>) and negatively charged residues (D163<sup>2.50</sup>, E133<sup>1.49</sup>) (Figure 3A). Thermodynamic calculations show that the activation barrier for this transition is  $\sim 1.5 \pm 0.3$  kcal/mol (Figure S4A and S12B). Moreover, kinetic calculations with TPT analysis show that forward and backward transition between

the primary and secondary binding site happens within the microsecond timescale (Figure S13). Therefore, thermodynamically and kinetically  $\text{Na}^+$  binding is feasible for either binding site in  $\text{CB}_1$ .

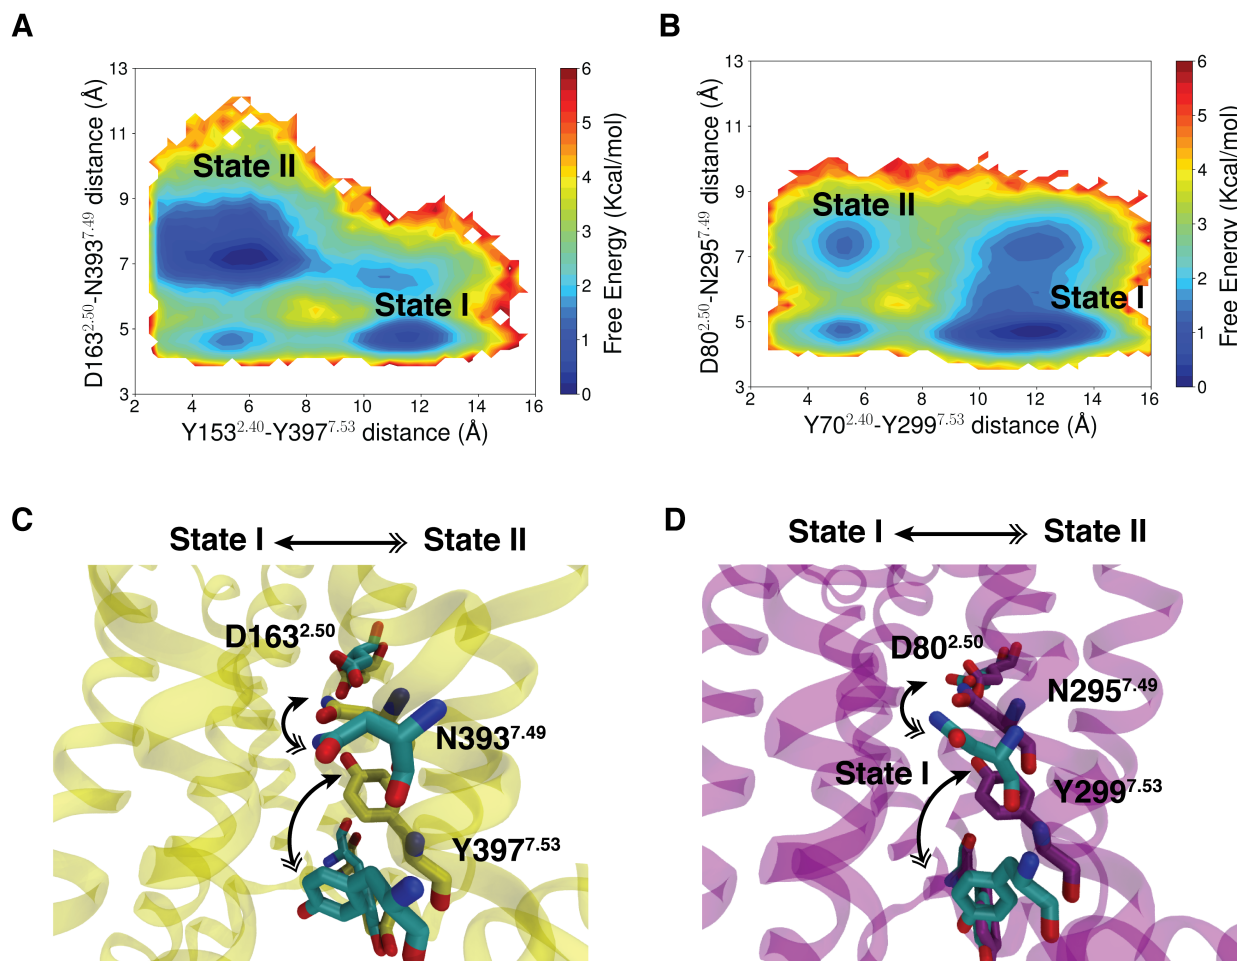

Figure 4: TM7 movement leads to larger distance between polar residues in the  $\text{Na}^+$  binding pocket. (A) MSM weighted free energy landscape projected along  $\text{Y153}^{2.40}$  ( $\text{O}\eta$ ) -  $\text{Y397}^{7.53}$  ( $\text{O}\eta$ ) distance and  $\text{D163}^{2.50}$  ( $\text{C}\gamma$ ) -  $\text{N393}^{7.49}$  ( $\text{C}\gamma$ ) distance for  $\text{CB}_1$ . (B) MSM weighted free energy landscape projected along  $\text{Y70}^{2.40}$  ( $\text{O}\eta$ )- $\text{Y299}^{7.53}$  ( $\text{O}\eta$ ) distance and  $\text{D80}^{2.50}$  ( $\text{C}\gamma$ ) -  $\text{N295}^{7.49}$  ( $\text{C}\gamma$ ) distance for  $\text{CB}_2$ . (C) shows the residue movement between state I and state II.

Similarly for  $\text{CB}_2$ , we observe both the states in MSM weighted free energy landscape estimated using distance between  $\text{Y70}^{2.40}$ - $\text{Y299}^{7.53}$  and  $\text{D80}^{2.50}$ - $\text{N295}^{7.49}$  residue pairs (Figures 4B and S12B). However, state II has less population in  $\text{CB}_2$  compared to  $\text{CB}_1$  (Figure S14). Therefore, TM2 remains close TM7 and  $\text{Na}^+$  has less probability to move to the secondary

binding site. Furthermore, comparison between volume distribution of secondary binding site for CB<sub>1</sub> and CB<sub>2</sub> shows that CB<sub>1</sub> has larger volume as compared to CB<sub>2</sub> (Figure S15). To understand the structural reasons behind this volume change, the distance distribution between conserved residues in TM1 (N<sup>1.50</sup>) and TM7(N<sup>7.49</sup>) was estimated. It shows that TM1 and TM7 are more distant from one another in CB<sub>1</sub> as compared to CB<sub>2</sub> (Figure S16A). Lower flexibility in TM1 for CB<sub>2</sub> may emerge due to the steric hindrance from bulky F<sup>2.51</sup> residue in TM2, which blocks the outward movement of TM1. Superimposition of the both inactive structure show that CB<sub>1</sub> has smaller V<sup>2.51</sup> residue in the same position (Figure S16B). Therefore, lower flexibility of TM1 and TM7 explains the absence of secondary binding site in CB<sub>2</sub>.

**Intracellular Na<sup>+</sup> binding for CB<sub>1</sub>.** Selvam et al. has shown that Na<sup>+</sup> could bind from the intracellular side in GPCRs (33). For CB<sub>1</sub>, the similar phenomena is observed. Na<sup>+</sup> binds from the intracellular side between the gap of TM1 and TM7 (Figures 5A, 5C, and S17A). Negatively charged E133<sup>1.49</sup> and polar T391<sup>7.47</sup> helps Na<sup>+</sup> moves inside the secondary binding site. MSM-weighted free energy landscape shows that side-chains of these two residues come close to drive the Na<sup>+</sup> inside the secondary binding pocket (Figures 5A and 5C). Previous studies have also shown that E133<sup>1.49</sup> acts as a potentially allosteric binding site for CB<sub>1</sub> (38, 39).

Although CB<sub>2</sub> has conserved E50<sup>1.49</sup> and Na<sup>+</sup> occupancy of the E50<sup>1.49</sup> site is  $14.6 \pm 1.2\%$ , intracellular binding for CB<sub>2</sub> is not detected in our simulations (Figure S3C). There can be two explanations for this phenomenon. CB<sub>2</sub> has hydrophobic M293<sup>7.47</sup> instead of polar T391<sup>7.47</sup> residue that can hinder the Na<sup>+</sup> binding from inside the receptor. Furthermore, backbones of TM1 and TM7 remain close together as discussed in the previous section (Figure S18A). Therefore, E50<sup>1.49</sup> side chain cannot enter the secondary binding site to facilitate Na<sup>+</sup> binding as shown in Figures 5B and 5D. Therefore, these structural and sequence changes in TM1 and TM7 region explain absence of intracellular Na<sup>+</sup> binding for CB<sub>2</sub>.

We also compare the CB<sub>1</sub> intracellular binding site with the GPCRs where intracellular

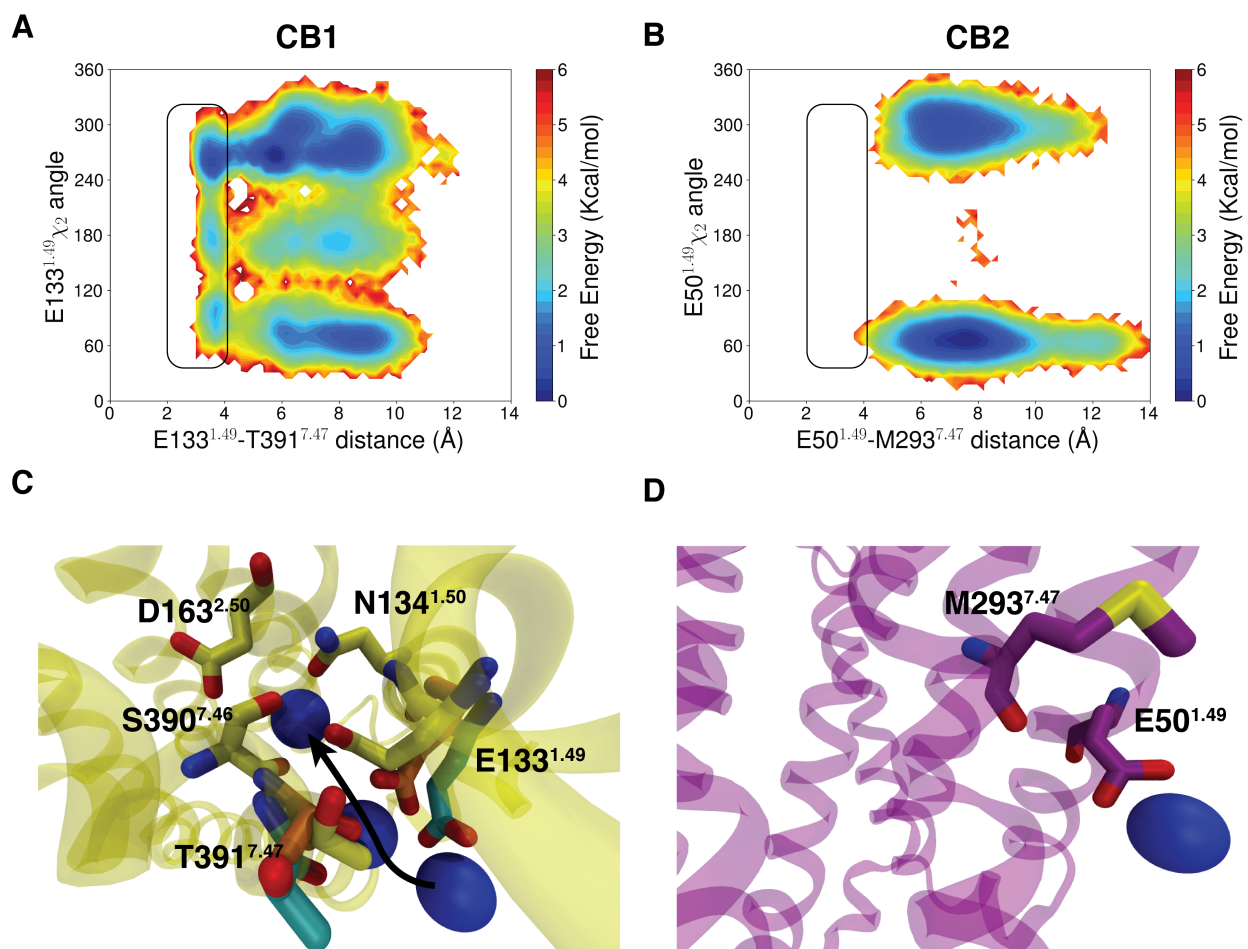

Figure 5: Na<sup>+</sup> binding from intracellular region. (A) MSM weighted free energy landscape between E133<sup>1.49</sup> (C $\delta$ ) -T391<sup>7.47</sup> (O $\gamma$ ) distance and E133<sup>1.49</sup> sidechain  $\chi_2$  angle for CB<sub>1</sub>. (B) MSM weighted free energy landscape between E50<sup>1.49</sup> (C $\delta$ ) -M293<sup>7.47</sup> (S $\delta$ ) distance and E50<sup>1.49</sup> sidechain  $\chi_2$  angle for CB<sub>2</sub>. (C) shows intracellular binding of Na<sup>+</sup> for CB<sub>1</sub>. Arrow is representing the pathway for Na<sup>+</sup> binding. E133<sup>1.49</sup>, T391<sup>7.47</sup> are colored in differently to show different stages of binding (Na<sup>+</sup> in intracellular region: cyan, Transition state: orange, Na<sup>+</sup> bound to secondary binding site: yellow). Proteins are represented as Cartoon (CB<sub>1</sub>: yellow, CB<sub>2</sub>: violet). Important residues are represented as sticks.

Na<sup>+</sup> binding was established before such as PAR1 and P2Y12. It shows that PAR1 has hydrophobic residue in place of E<sup>1.49</sup>. However it has P<sup>1.48</sup> close to intracellular binding site which gives TM1 more flexibility to move (Figure S18B). In case of P2Y12, we observe a polar residue T<sup>1.49</sup> in the same position (Figure S18C). Therefore, flexibility in TM1 and TM7 and polar residues in the 1.49 position may be deterministic factor for intracellular Na<sup>+</sup> binding.

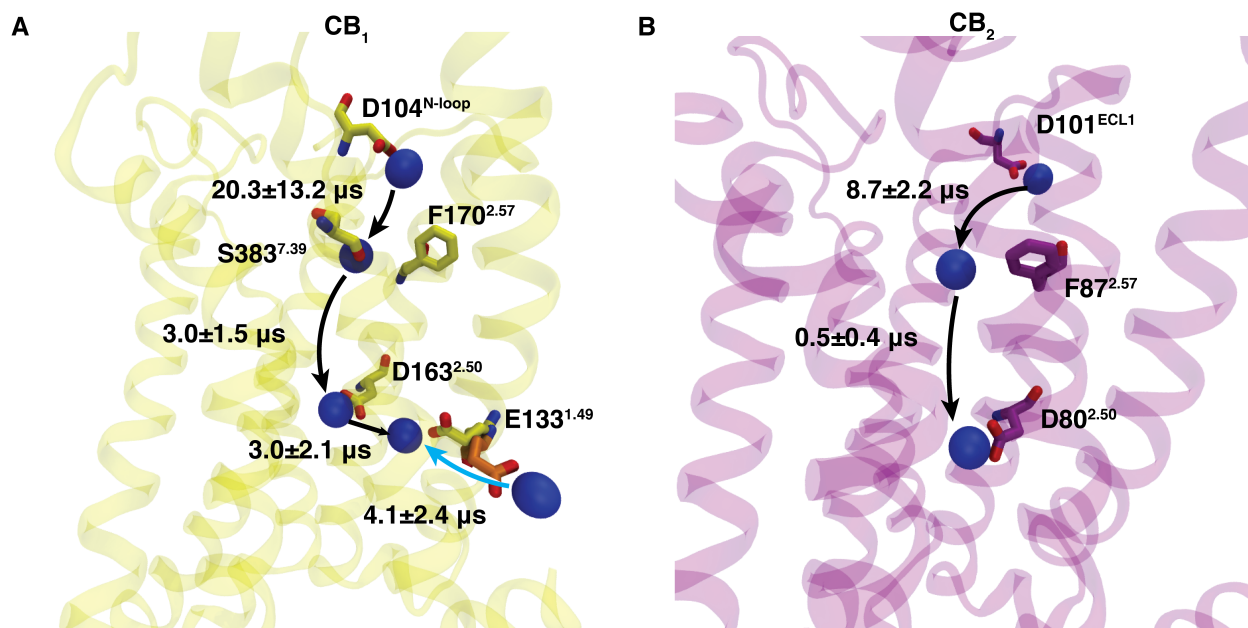

Figure 6: Overall pathway for Na<sup>+</sup> binding for CB<sub>1</sub> (A) and CB<sub>2</sub> (B). Timescales for jump between two important steps are shown by TPT analysis. E133<sup>1.49</sup> residues are shown in two different color to represent two different states (Na<sup>+</sup> bound to secondary binding site: yellow, Na<sup>+</sup> in the intracellular region: orange).

## Conclusions

In this study we compare the Na<sup>+</sup> binding processes for two cannabinoid receptors. Although these two receptors share 44% sequence similarity and orthosterically bind similar classes of ligands, we observe clear differences in their respective Na<sup>+</sup> binding sites and pathways. Kinetically extracellular Na<sup>+</sup> binding is faster for CB<sub>2</sub> compared to CB<sub>1</sub> (Figures 6A, 6B). Whereas, thermodynamics calculations show opposite trend for extracellular binding of Na<sup>+</sup> (Figure S19A). Standard binding free energy for extracellular Na<sup>+</sup> binding for CB<sub>1</sub> and CB<sub>2</sub> is in the same range as previously calculated free energies (2-5 kcal/mol) for other class A GPCR (33). We also observe intracellular binding of Na<sup>+</sup> in CB<sub>1</sub> and the standard binding free energy for extracellular and intracellular binding are energetically similar. However, kinetically intracellular binding of CB<sub>1</sub> is more accessible (Figures 6A, and S19B). Comparison with previously reported intracellular binding of Na<sup>+</sup> shows that TM1 and TM7 flexibility and polar residue at 1.49 position is required for Na<sup>+</sup> to bind from intracellular direction.

Future studies may reveal intracellular  $\text{Na}^+$  binding for other class A GPCRs.

We also observe a secondary  $\text{Na}^+$  binding site for  $\text{CB}_1$  which has not been previously reported. This site is accessible from both intracellular and extracellular side. The inward movement of E133<sup>1,49</sup> stabilize  $\text{Na}^+$  in that position (Figures 6A) which has been previously reported as allosteric binding site(38, 39). Although  $\text{Na}^+$  binding is conserved for all class A GPCRs, large differences may exist in  $\text{Na}^+$  binding co-ordination sites and binding pathway due to evolutionary divergence in GPCR sequence. These changes in  $\text{Na}^+$  binding could be exploited for the design of allosteric modulators of GPCRs.

## Methods

### System Preparation

The crystal structures of inactive  $\text{CB}_1$ (PDB ID: 5TGZ(5)) and  $\text{CB}_2$  (PDB ID: 5ZTY (11)) were used as a starting structure for the simulation. Ligands, other non-protein molecules and the stabilizing fusion parter between TM5 and TM6 were removed from the crystal structures. Thermostabilized residues in protein crystal structure were mutated back according to the original protein sequence (5, 11). Hydrogen atoms were added to the system using the reduce command in AMBER tools. Truncated N-loop, C-loop and unconnected TM5 and TM6 were neutralized by adding acetyl (ACE) and methylamide (NME) capping groups. To embed proteins within a membrane environment and to solvate the extracellular and intracellular region, CHARMM-GUI software was used (40). We employ POPC membrane layer for our simulation. A physiological salt ( $\text{Na}^+$  and  $\text{Cl}^-$ ) concentration of 150 mM and TIP3P water model were used to solvate the system. Lastly, system parameterization was done using AMBER ff14SB and Lipid17 forcefield ((41, 42)) .

## Simulation Details

AMBER18 package was used to run MD simulations on BlueWaters Supercomputer at National Center for Supercomputing Applications(43). Before proceeding to the production stage of simulation, system was minimized and equilibrated. System minimization was done using gradient descent and conjugate gradient algorithm for 15000 steps. Minimized system was heated in NVT ensemble to increase the temperature of the system gradually from 0 to 10K and 10K to 300K. Each heating step is performed for 1 ns. To maintain the pressure of heated system at 1 bar, NPT ensemble was implemented. During heating and pressure increasing step, backbone carbon atoms ( $C\alpha$ ) were restrained using a spring force. The system was equilibrated for 50 ns at 300K and 1 bar without any restraint before moving to production run. A 2 fs timestep was used for the simulation. To stabilize the hydrogen bond vibration in the 2fs timestep, the SHAKE algorithm was used(44). A 10 Å cutoff was used for the nonbonded interactions. Long range electrostatic interactions are taken into account by the Particle Mesh Ewald method (45). Production runs of the simulation are performed in a NPT ensemble. Periodic boundary conditions are maintained throughout the simulation.

## Adaptive Sampling

Previous computational studies have shown that  $\text{Na}^+$  binding to a GPCR is a slow process. With a single long trajectory, we may not be able to observe the  $\text{Na}^+$  binding. Therefore, to capture the  $\text{Na}^+$  binding event, we implement adaptive sampling (46–50). Adaptive Sampling approaches have been successfully used to sample protein-ion binding(33), protein-ligand binding(51, 52), protein conformational change(53–56), folding(57) and protein-protein association(58). Adaptive sampling is an iterative sampling process to make simulation parallelizable by simultaneously running multiple short simulations. First, we project our simulation data onto reaction co-ordinates in which we want to make our sampling efficient. We then cluster the projected data into states using k-means clustering. We select

the starting point for the next round of simulation from the least counted states. For this case, the reaction coordinates that are used to sample from our data include the distant between closest  $\text{Na}^+$  from  $\text{D}^{2.50}$ . For  $\text{CB}_1$  and  $\text{CB}_2$ , we perform  $\sim 37\mu\text{s}$  and  $\sim 26\mu\text{s}$  of aggregate simulation.

## Markov State Models

To capture the thermodynamics and kinetics information from simulation, we build Markov state model (MSM) on MD data. MSM assumes Markovian properties of MD data and accordingly generates ensemble distribution of the protein dynamic landscape (59–61). To build MSM describing the  $\text{Na}^+$  binding event, simulation data are represented using features (e.g. residue-residue distance, binding distance, dihedral angles) important to capture the binding process and important structural changes (Tables S1 and S2). For better approximation of MSM timescales, features was linearly transformed to time-independent components (tiCs) (62, 63). Tic helps to project the data along the slowest components for better characterization of slowest process (Figure S6). The projected space is then further discretized into states. MSM calculates the probability of the states and timescales of transition by estimating the eigenvectors and eigenvalues of the corresponding transition probability matrix,  $T$ . Each element of  $T$  ( $T_{ij}$ ), is estimated from the probability of jump between state  $i$  to state  $j$  at a particular lag time ( $\tau$ ). To find out the lag time at which the Markovian property is valid, implied timescale was calculated using Tics capturing 95 percent kinetic variance compared to all tic components and 30 ns of tic lag time. Minimum lag time at which implied time scale of slowest process converged (with 5 percent of two consecutive points) is selected to be the MSM lag time (Figures S20A and S20B). To optimize other hyperparameters (cluster numbers and number of tic components), VAMP2 scores are compared by building MSM with different cluster numbers and tic variational cutoff (Figures S20C and S20D) (64).



## Trajectory Analysis

MD trajectory features are calculated and analyzed using MDtraj (65) and CPPTRAJ (66). Pore tunnel radius calculation was performed using HOLE software (67). Pocket volume calculation was performed using Fpocket (36) and POVME (68). For trajectory visualization, VMD package is used (69).

## Standard Binding Free Energy Calculation

To calculate free energy, we project our data into x, y, and z component distance of  $\text{Na}^+$  from the  $D^{2.50}$  (70). The 3-D projection is clustered into into  $300*300*300$  bins. The standard binding free energy is calculated using the formula  $\Delta G_0 = -k_B T \log \frac{V_b}{V_0} - \Delta W$  (70). In this case is the  $\Delta W$  is the depth of 3-D potential mean force force calculated using MSM.  $V_0$  is equal to  $1661 \text{ \AA}^3$  which is corresponds to 1M concentration of  $\text{Na}^+$ .  $V_b$  is the weighted binding volume calculated using the formula  $\int \exp(\beta W(x, y, z)) dx dy dz$ .

## Transition Path Theory

Transition path theory (TPT) calculates the timescale for transition between different MSM macrostates by estimating mean free passage time. MFPT between macrostate A and B is determined by the equation where  $MFPT = \frac{\tau \pi_A}{F_{AB}}$  (71). where  $\pi_A$  is the probability of macrostate A calculated by MSM.  $F_{AB}$  is flux between macrostate A and B which is determined by the equation  $F_{AB} = \sum_{i \in A} \sum_{j \notin A} \pi_i T_{ij} q_j^+$  where  $q_j^+$  is probability of state j to move to B before A and  $T_{ij}$  is the probability of jump from state i to state j at lagtime  $\tau$ .  $q_j^+$  is estimated from the balance equation  $-q_j^+ + \sum_{k \in I} T_{jk} q_k^+ = -\sum_{k \in B} T_{jk}$ . TPT calculation is performed using pyEMMA software package (72).

## Error Calculation

Errors on thermodynamics and kinetic calculations is determined by bootstrapping (73). We generate 200 rounds of bootstrap samples where each sample contains randomly picked 80% of total trajectories. We keep the state index same and build MSM for each of sample. Using the calculated stationary density and transition probability matrix of each sample, we determine error in our calculations.

## References

1. Zou, S., and Kumar, U. (2018) Cannabinoid receptors and the endocannabinoid system: signaling and function in the central nervous system. *International journal of molecular sciences* 19, 833.
2. Howlett, A. C. (2002) International Union of Pharmacology. XXVII. Classification of Cannabinoid Receptors. *Pharmacological Reviews* 54, 161–202.
3. Pertwee, R. (2008) The diverse CB1 and CB2 receptor pharmacology of three plant cannabinoids:  $\Delta$ 9-tetrahydrocannabinol, cannabidiol and  $\Delta$ 9-tetrahydrocannabivarin. *British journal of pharmacology* 153, 199–215.
4. Hilger, D., Masureel, M., and Kobilka, B. K. (2018) Structure and dynamics of GPCR signaling complexes. *Nature Structural & Molecular Biology* 25, 4–12.
5. Hua, T. et al. (2016) Crystal Structure of the Human Cannabinoid Receptor CB1. *Cell* 167, 750–762.e14.
6. Hua, T. et al. (2017) Crystal structures of agonist-bound human cannabinoid receptor CB1. *Nature* 547, 468–471.
7. Shao, Z., Yin, J., Chapman, K., Grzemska, M., Clark, L., Wang, J., and Rosen-

- baum, D. M. (2016) High-resolution crystal structure of the human CB1 cannabinoid receptor. *Nature* 540, 602–606.
8. Shao, Z., Yan, W., Chapman, K., Ramesh, K., Ferrell, A. J., Yin, J., Wang, X., Xu, Q., and Rosenbaum, D. M. (2019) Structure of an allosteric modulator bound to the CB1 cannabinoid receptor. *Nature chemical biology* 15, 1199–1205.
  9. Kumar, K. K. et al. (2019) Structure of a Signaling Cannabinoid Receptor 1-G Protein Complex. *Cell* 176, 448–458.e12.
  10. Li, X., Shen, L., Hua, T., and Liu, Z.-J. (2020) Structural and Functional Insights into Cannabinoid Receptors. *Trends in Pharmacological Sciences*
  11. Li, X. et al. (2019) Crystal Structure of the Human Cannabinoid Receptor CB2. *Cell* 176, 459–467.e13.
  12. An, D., Peigneur, S., Hendrickx, L. A., and Tytgat, J. (2020) Targeting Cannabinoid Receptors: Current Status and Prospects of Natural Products. *International Journal of Molecular Sciences* 21, 5064.
  13. Pertwee, R. G. (2005) Pharmacological actions of cannabinoids. *Cannabinoids* 1–51.
  14. Adams, A. J., Banister, S. D., Irizarry, L., Trecki, J., Schwartz, M., and Gerona, R. (2017) “Zombie” Outbreak Caused by the Synthetic Cannabinoid AMB-FUBINACA in New York. *New England Journal of Medicine* 376, 235–242.
  15. Moreira, F. A., and Crippa, J. A. S. (2009) The psychiatric side-effects of rimonabant. *Revista Brasileira de Psiquiatria* 31, 145–153.
  16. Scott, C. E., and Kendall, D. A. *Methods in Enzymology*; Elsevier, 2017; pp 317–342.
  17. Saleh, N., Hucke, O., Kramer, G., Schmidt, E., Montel, F., Lipinski, R., Ferger, B., Clark, T., Hildebrand, P. W., and Tautermann, C. S. (2018) Multiple Binding Sites

- Contribute to the Mechanism of Mixed Agonistic and Positive Allosteric Modulators of the Cannabinoid CB1 Receptor. *Angewandte Chemie International Edition* 57, 2580–2585.
18. Ahn, K. H., Mahmoud, M. M., and Kendall, D. A. (2012) Allosteric Modulator ORG27569 Induces CB1 Cannabinoid Receptor High Affinity Agonist Binding State, Receptor Internalization, and Gi Protein-independent ERK1/2 Kinase Activation. *Journal of Biological Chemistry* 287, 12070–12082.
  19. Tao, Q., and Abood, M. E. (1998) Mutation of a highly conserved aspartate residue in the second transmembrane domain of the cannabinoid receptors, CB1 and CB2, disrupts G-protein coupling. *Journal of Pharmacology and Experimental Therapeutics* 285, 651–658.
  20. Nie, J., and Lewis, D. L. (2001) Structural domains of the CB1 cannabinoid receptor that contribute to constitutive activity and G-protein sequestration. *Journal of Neuroscience* 21, 8758–8764.
  21. Houston, D. B., and Howlett, A. C. (1998) Differential receptor–G-protein coupling evoked by dissimilar cannabinoid receptor agonists. *Cellular signalling* 10, 667–674.
  22. Katritch, V., Fenalti, G., Abola, E. E., Roth, B. L., Cherezov, V., and Stevens, R. C. (2014) Allosteric sodium in class A GPCR signaling. *Trends in Biochemical Sciences* 39, 233–244.
  23. Zarzycka, B., Zaidi, S. A., Roth, B. L., and Katritch, V. (2019) Harnessing Ion-Binding Sites for GPCR Pharmacology. *Pharmacological Reviews* 71, 571–595.
  24. Hua, T. et al. (2020) Activation and Signaling Mechanism Revealed by Cannabinoid Receptor-Gi Complex Structures. *Cell* 180, 655–665.e18.

25. Xing, C. et al. (2020) Cryo-EM Structure of the Human Cannabinoid Receptor CB2-Gi Signaling Complex. *Cell* *180*, 645–654.e13.
26. Cheng, R. K. Y. et al. (2017) Structural insight into allosteric modulation of protease-activated receptor 2. *Nature* *545*, 112–115.
27. Shang, Y., LeRouzic, V., Schneider, S., Bisignano, P., Pasternak, G. W., and Filizola, M. (2014) Mechanistic Insights into the Allosteric Modulation of Opioid Receptors by Sodium Ions. *Biochemistry* *53*, 5140–5149.
28. Selent, J., Sanz, F., Pastor, M., and De Fabritiis, G. (2010) Induced effects of sodium ions on dopaminergic G-protein coupled receptors. *PLoS Comput Biol* *6*, e1000884.
29. Vickery, O. N., Carvalheda, C. A., Zaidi, S. A., Pislakov, A. V., Katritch, V., and Zachariae, U. (2018) Intracellular Transfer of Na<sup>+</sup> in an Active-State G-Protein-Coupled Receptor. *Structure* *26*, 171–180.e2.
30. Cong, X., and Golebiowski, J. (2018) Allosteric Na<sup>+</sup>-binding site modulates CXCR4 activation. *Physical Chemistry Chemical Physics* *20*, 24915–24920.
31. Vickery, O. N., Machtens, J.-P., Tamburrino, G., Seeliger, D., and Zachariae, U. (2016) Structural Mechanisms of Voltage Sensing in G Protein-Coupled Receptors. *Structure* *24*, 997–1007.
32. Yuan, S., Vogel, H., and Filipek, S. (2013) The Role of Water and Sodium Ions in the Activation of the  $\mu$ -Opioid Receptor. *Angewandte Chemie International Edition* *52*, 10112–10115.
33. Selvam, B., Shamsi, Z., and Shukla, D. (2018) Universality of the Sodium Ion Binding Mechanism in Class AG-Protein-Coupled Receptors. *Angewandte Chemie* *130*, 3102–3107.

34. Latorraca, N. R., Venkatakrishnan, A., and Dror, R. O. (2017) GPCR dynamics: structures in motion. *Chemical reviews* 117, 139–155.
35. Kohlhoff, K. J., Shukla, D., Lawrenz, M., Bowman, G. R., Konerding, D. E., Belov, D., Altman, R. B., and Pande, V. S. (2014) Cloud-based simulations on Google Exacycle reveal ligand modulation of GPCR activation pathways. *Nature chemistry* 6, 15.
36. Guilloux, V. L., Schmidtke, P., and Tuffery, P. (2009) Fpocket: An open source platform for ligand pocket detection. *BMC Bioinformatics* 10, 168.
37. Feng, Z., Alqarni, M. H., Yang, P., Tong, Q., Chowdhury, A., Wang, L., and Xie, X.-Q. (2014) Modeling, Molecular Dynamics Simulation, and Mutation Validation for Structure of Cannabinoid Receptor 2 Based on Known Crystal Structures of GPCRs. *Journal of Chemical Information and Modeling* 54, 2483–2499.
38. Platania, C. B. M., and Bucolo, C. *Methods in Molecular Biology*; Springer US, 2020; pp 245–254.
39. Vallée, M. et al. (2014) Pregnenolone Can Protect the Brain from Cannabis Intoxication. *Science* 343, 94–98.
40. Wu, E. L., Cheng, X., Jo, S., Rui, H., Song, K. C., Dávila-Contreras, E. M., Qi, Y., Lee, J., Monje-Galvan, V., Venable, R. M., Klauda, J. B., and Im, W. (2014) CHARMM-GUI Membrane Buildertoward realistic biological membrane simulations. *Journal of Computational Chemistry* 35, 1997–2004.
41. Maier, J. A., Martinez, C., Kasavajhala, K., Wickstrom, L., Hauser, K. E., and Simmerling, C. (2015) ff14SB: Improving the Accuracy of Protein Side Chain and Backbone Parameters from ff99SB. *Journal of Chemical Theory and Computation* 11, 3696–3713.
42. Gould, I., Skjevik, A., Dickson, C., Madej, B., and Walker, R. (2018) Lipid17: A com-

prehensive AMBER force field for the simulation of zwitterionic and anionic lipids.

*Manuscript in preparation*

43. Salomon-Ferrer, R., Götz, A. W., Poole, D., Grand, S. L., and Walker, R. C. (2013) Routine Microsecond Molecular Dynamics Simulations with AMBER on GPUs. 2. Explicit Solvent Particle Mesh Ewald. *Journal of Chemical Theory and Computation* 9, 3878–3888.
44. Kräutler, V., Van Gunsteren, W. F., and Hünenberger, P. H. (2001) A fast SHAKE algorithm to solve distance constraint equations for small molecules in molecular dynamics simulations. *Journal of computational chemistry* 22, 501–508.
45. Essmann, U., Perera, L., Berkowitz, M. L., Darden, T., Lee, H., and Pedersen, L. G. (1995) A smooth particle mesh Ewald method. *The Journal of chemical physics* 103, 8577–8593.
46. Bowman, G. R., Ensign, D. L., and Pande, V. S. (2010) Enhanced Modeling via Network Theory: Adaptive Sampling of Markov State Models. *Journal of Chemical Theory and Computation* 6, 787–794.
47. Abella, J. R., Antunes, D., Jackson, K., Lizée, G., Clementi, C., and Kavraki, L. E. (2020) Markov state modeling reveals alternative unbinding pathways for peptide–MHC complexes. *Proceedings of the National Academy of Sciences* 117, 30610–30618.
48. Zimmerman, M. I., Porter, J. R., Sun, X., Silva, R. R., and Bowman, G. R. (2018) Choice of Adaptive Sampling Strategy Impacts State Discovery, Transition Probabilities, and the Apparent Mechanism of Conformational Changes. *Journal of Chemical Theory and Computation* 14, 5459–5475.
49. Shamsi, Z., Cheng, K. J., and Shukla, D. (2018) Reinforcement learning based adaptive sampling: REAPing rewards by exploring protein conformational landscapes. *The Journal of Physical Chemistry B* 122, 8386–8395.

50. Shamsi, Z., Moffett, A. S., and Shukla, D. (2017) Enhanced unbiased sampling of protein dynamics using evolutionary coupling information. *Scientific reports* 7, 1–13.
51. Lawrenz, M., Shukla, D., and Pande, V. S. (2015) Cloud computing approaches for prediction of ligand binding poses and pathways. *Scientific reports* 5, 1–5.
52. Shukla, S., Zhao, C., and Shukla, D. (2019) Dewetting controls plant hormone perception and initiation of drought resistance signaling. *Structure* 27, 692–702.
53. Moffett, A. S., Bender, K. W., Huber, S. C., and Shukla, D. (2017) Allosteric control of a plant receptor kinase through S-glutathionylation. *Biophysical journal* 113, 2354–2363.
54. Cheng, K. J., Selvam, B., Chen, L.-Q., and Shukla, D. (2019) Distinct substrate transport mechanism identified in homologous sugar transporters. *The Journal of Physical Chemistry B* 123, 8411–8418.
55. Selvam, B., Yu, Y.-C., Chen, L.-Q., and Shukla, D. (2019) Molecular basis of the glucose transport mechanism in plants. *ACS Central Science* 5, 1085–1096.
56. Selvam, B., Mittal, S., and Shukla, D. (2018) Free energy landscape of the complete transport cycle in a key bacterial transporter. *ACS Central Science* 4, 1146–1154.
57. Lane, T. J., Shukla, D., Beauchamp, K. A., and Pande, V. S. (2013) To milliseconds and beyond: challenges in the simulation of protein folding. *Current opinion in structural biology* 23, 58–65.
58. Zhao, C., and Shukla, D. (2018) SAXS-guided enhanced unbiased sampling for structure determination of proteins and complexes. *Scientific reports* 8, 1–13.
59. Chodera, J. D., and Noé, F. (2014) Markov state models of biomolecular conformational dynamics. *Current Opinion in Structural Biology* 25, 135–144.
60. Husic, B. E., and Pande, V. S. (2018) Markov State Models: From an Art to a Science. *Journal of the American Chemical Society* 140, 2386–2396.



61. Shukla, D., Hernández, C. X., Weber, J. K., and Pande, V. S. (2015) Markov state models provide insights into dynamic modulation of protein function. *Accounts of chemical research* 48, 414–422.
62. Pérez-Hernández, G., Paul, F., Giorgino, T., Fabritiis, G. D., and Noé, F. (2013) Identification of slow molecular order parameters for Markov model construction. *The Journal of Chemical Physics* 139, 015102.
63. Noé, F., and Clementi, C. (2015) Kinetic Distance and Kinetic Maps from Molecular Dynamics Simulation. *Journal of Chemical Theory and Computation* 11, 5002–5011.
64. Wu, H., and Noé, F. (2019) Variational Approach for Learning Markov Processes from Time Series Data. *Journal of Nonlinear Science* 30, 23–66.
65. McGibbon, R. T., Beauchamp, K. A., Harrigan, M. P., Klein, C., Swails, J. M., Hernández, C. X., Schwantes, C. R., Wang, L.-P., Lane, T. J., and Pande, V. S. (2015) MDTraj: A Modern Open Library for the Analysis of Molecular Dynamics Trajectories. *Biophysical Journal* 109, 1528 – 1532.
66. Roe, D. R., and Cheatham, T. E. (2013) PTRAJ and CPPTRAJ: Software for Processing and Analysis of Molecular Dynamics Trajectory Data. *Journal of Chemical Theory and Computation* 9, 3084–3095.
67. Smart, O. S., Goodfellow, J. M., and Wallace, B. (1993) The pore dimensions of gramicidin A. *Biophysical journal* 65, 2455–2460.
68. Wagner, J. R., Sørensen, J., Hensley, N., Wong, C., Zhu, C., Perison, T., and Amaro, R. E. (2017) POVME 3.0: Software for Mapping Binding Pocket Flexibility. *Journal of Chemical Theory and Computation* 13, 4584–4592.
69. Humphrey, W., Dalke, A., and Schulten, K. (1996) VMD: visual molecular dynamics. *Journal of molecular graphics* 14, 33–38.

70. Buch, I., Giorgino, T., and De Fabritiis, G. (2011) Complete reconstruction of an enzyme-inhibitor binding process by molecular dynamics simulations. *Proceedings of the National Academy of Sciences* *108*, 10184–10189.
71. Noé, F., Schütte, C., Vanden-Eijnden, E., Reich, L., and Weikl, T. R. (2009) Constructing the equilibrium ensemble of folding pathways from short off-equilibrium simulations. *Proceedings of the National Academy of Sciences* *106*, 19011–19016.
72. Scherer, M. K., Trendelkamp-Schroer, B., Paul, F., Prez-Hernandez, G., Hoffmann, M., Plattner, N., Wehmeyer, C., Prinz, J.-H., and No, F. (2015) PyEMMA 2: A Software Package for Estimation, Validation, and Analysis of Markov Models. *Journal of Chemical Theory and Computation* *11*, 5525–5542.
73. Sultan, M. M., Kiss, G., and Pande, V. S. (2018) Towards simple kinetic models of functional dynamics for a kinase subfamily. *Nature Chemistry* *10*, 903–909.
